# Supplementary material for: Assessment taxonomy and pathways of alien plant species in Egyptian protected areas
Source: Sci Rep. 2025 Nov 12;15:39577. doi: 10.1038/s41598-025-24266-3 (PMC12612076; doi:10.1038/s41598-025-24266-3)
Supplement: Supplementary file 2 — Supplementary Information 2. [file 41598_2025_24266_MOESM2_ESM.xlsx]

## Sheet: Total no.
Protected Area	Actual No. of Species	Actual No. of Alien Sp.	Rc No. of Alien Sp.
Ras Mohamed	80	2	0.025
Zaranik	136	2	0.0147
El-Ahrash
Omayed	251	5	0.0199
Elba	162	4	0.0246
Saluga and Ghazal
St. Katherine	715	34	0.0475
Ashtum El-Gamil	144	12	0.083
Lake Qaroun	46	5	0.1086
Wadi El-Rayan	38	3	0.0789
Wadi Allaqi	97	4	0.041
Wadi El-Asiouty
El-Hasana Dome
Petrified Forest	27	3	0.1111
Wadi Sanour Cave
Nabq	24	0	0
Abu-Galum	165	2	0.0121
Taba
Lake Burullus	197	27	0.137
River Nile Islands
Wadi Degla	170	13	0.081
Siwa	82	10	0.1219
White Desert	44	0	0
Wadi El-Gemal - Hamata
Northern Islands of Red Sea
El-Gilf El-Kebir	17	0	0
Dabaiba
Sallum	111	3	0.027
Bahareya Oasis
Gabal El-Kamel

## Sheet: Sheet6
Protected Area	Actual No. of Species	Actual No. of Alien Sp.	Rc No. of Alien Sp.
Ras Mohamed	80	2	0.025
Zaranik	136	2	0.0147
Omayed	251	5	0.0199
Elba	162	4	0.0246
St. Katherine	715	34	0.0475
Ashtum El-Gamil	144	12	0.083
Lake Qaroun	46	5	0.1086
Wadi El-Rayan	38	3	0.0789
Wadi Allaqi	97	4	0.041
Petrified Forest	27	3	0.1111
Nabq	24	0	0
Abu-Galum	165	2	0.0121
Lake Burullus	197	27	0.137
Wadi Degla	160	13	8.1
Siwa	82	10	0.1219
White Desert	44	0	0
El-Gilf El-Kebir	17	0	0
Sallum	111	3	0.027

## Sheet: Distribution
Protected Area	Omayed	Elba	St. Katherine	Ashtum El-Gamil	Lake Qaroun	Wadi El-Rayan	Wadi Allaqi	Petrified Forest	Wadi Degla	Siwa	White Desert	El-Gilf El-Kebir	Sallum	Zaranik	Lake Burullus	Ras Mohamed	Abu-Galum	Number of PA	Nabaq	Taba	Northern Islands of the Red Sea	Bahariya Oasis	Gabal El-Kamel	Wadi El-Gemal	Wadi El-Asiouty	River Nile Islands	Saluga and Ghazal	Dabaiba	Wadi Sanour Cave	El-Hasana Dome
Acacia farnesiana* (L.) Willd.										*								1
Allium cepa									*
Althaea ludwigiu L.	*		*															2
Amaranthus hybridus L.			*												*			2
Amaranthus lividus L.			*												*			2
Amaranthus retroflexus L.			*															1
Amaranthus spinosus L.			*															1
Arundo donax L.			*	*						*								3
Atriplex canescens (Pursh) Nutt.															*			1
Atriplex lindleyi subsp. Inflate (F. Muell.) P. G. Wilson								*										1
Atriplex nummularia Lindl.									*						*			1
Avena sativa									*
Azolla filiculoides L.				*											*			2
Bassia indica (Wight) A. J. Scott				*	*	*		*	*						*	*		6
Beta vulgaris subsp. maritima (L.) Arcang.			*	*	*								*		*			5
Bidens bipinnata L.		*																1
Bidens pilosa L.			*						*									1
Brachiaria mutica									*
Brassica rapa L.var.rapa															*			1
Briza maxima									*
Bromus catharticus Vahl			*										*		*			3
Cenchrus ciliaris L.		*														*		2
Cenchrus echinatus L.			*															1
Centaurea calcitrapa L.	*			*					*					*	*			4
Conyza bonariensis (S.Moore) Cufod.															*			1
Coriandrum sativum L.															*			1
Cuscuta chinensis Lam.		*																1
Dactylis glomerata L.	*																	1
Datura innoxia Mill.			*															1
Datura stramonium L.			*															1
Dinebra retroflexa (Vahl) Panz.					*													1
Dysphania ambrosioides (L.)Mosyakin & Clemants			*	*					*						*			3
Eclipta prostrata (L.) L.				*											*			2
Eichhornia crassipes (C. Mart.) Solms				*	*	*												3
Eruca vesicaria* (L.) Cav.	*		*							*					*			4
Euphorbia heterophylla L.			*															1
Euphorbia prostrata Aiton			*															1
Ficus carica L.			*															1
Habitat		Botanical and Wildlife	Mountain and Wadi	Wetland	Wetland	Mountain and Wadi	Mountain and Wadi	Geological and Historical	Mountain and Wadi	Desert and Geological Reserves	Desert and Geological Reserves	Desert and Geological Reserves		Wetland	Wetland	Marine and Coastal Reserves	Marine and Coastal Reserves		Marine and Coastal Reserves	Marine and Coastal Reserves	Marine and Coastal	Desert and Geological	Desert and Geological	Mountain and Wadi	Mountain and Wadi	Wet land	Wet land	Botanical and Wildlife	Geological and Historical	Geological and Historical
Heliotrobium curassavicum Vahl															*			1
Hibiscus sabdariffa L.										*								1
Hordeum vulgare L.															*			1
Ipomoea cairica (L.) Sweet			*						*									1
Ipomoea carnea Jacq.				*											*			2
Lantana camara L.										*								1
Lepidium draba L.			*															1
Lycium europaeum L.	*																	1
Medicago sativa L.										*								1
Mentha spicata L. subsp. spicata			*															1
Nicotiana glauca R. C. Graham			*							*								2
Nicotiana rustica L.			*															1
Oxalis corniculata L.			*										*					2
Ricinus communis L.			*		*		*		*	*					*			5
Rorippa palustris (L.) Besser															*			1
Rubus sanctus Schreb.			*															1
Sesbania sesban (L.) Merr.			*			*	*		*									3
Setaria pumila (Poir.) Roem. & Schult.			*															1
Setaria verticillata (L.) Beauv.			*	*														2
Setaria viridis (L.) Beauv.			*												*			2
Solanum elaeagnifolium Cav.														*				1
Solanum melongena									*
Sorghum virgatum (Hack.) Stapf.			*															1
Species
Symphyotrichum squamatum (Spreng.) Nesom			*	*														2
Trifolium alexandrinum L.															*			1
Zea mays L.							*											1
Ziziphus spina-christi (L.) Desf.			*				*			*							*	4

## Sheet: Family
Amaranthaceae	10
Asteraceae	6
Azollaceae	1
Boraginaceae	5
Convolvulaceae	3
Euphorbiaceae	3
Fabaceae	4
Lamiaceae	1
Malvaceae	2
Moraceae	1
Oxalidaceae	1
Poaceae	11
Pontederiaceae	1
Rhamnaceae	1
Rosaceae	1
Solanaceae	7
Umbelliferae	1
Verbenaceae	1

## Sheet: Pathways
														Tourism	21
														Transportation	2
	Protected Area	Pathways of the alien species												Trade	4
		Human activities					Dispersal mechanism							Agriculture	9
		Tourism	Transportation	Trade	Agriculture	Urbanization	Wind	Water	Animal	Bird Migration	Total			Urbanization	8
	Ras Mohamed	√					√			√	3			Wind	30
	Zaranik						√	√		√	3			Water	13
	El-Ahrash						√				1			Animal	13
	Omayed						√		√		2			Bird Migration	17
	Elba		√	√			√		√		4
	Saluga and Ghazal	√					√	√			2
	St. Katherine	√			√		√		√		3
	Ashtum El-Gamil		√	√	√		√	√	√	√	7
	Qaroun	√			√		√	√	√		4
	Wadi El-Rayan	√			√	√	√	√	√	√	6
	Wadi Allaqi			√			√		√	√	4
	Wadi El-Asiouty	√			√	√	√		√		4
	El-Hasana Dome	√					√				1
	Petrified Forest	√				√	√				2
	Wadi Sanour Cave	√					√				1
	Nabq	√					√	√		√	3
	Abu-Galum	√				√	√	√			3
	Taba	√			√		√				2
	Lake Burullus				√	√	√	√	√	√	6
	River Nile Islands	√		√	√	√	√	√	√	√	7
	Wadi Degla	√				√	√			√	3
	Siwa	√			√		√	√	√	√	5
	White Desert	√					√				1
	Wadi El-Gemal	√				√	√	√	√	√	5
	Northern Islands of Red Sea	√					√	√		√	3
	El-Gilf El-Kebir	√					√			√	2
	Dabaiba	√					√			√	2
	Sallum						√	√		√	3
	Bahareya Oasis	√					√		√	√	3
	Gabal El-Kamel						√			√	2
	Total	21	2	4	9	8	30	13	13	17

## Sheet: Charactarestic
	Aspects	Biological activity	Habitat	Protected Num.	Goods&Serveces	Life Form	Sex Form	Disbersal Type	Growth Form	Status	Time Lag	GPS	Column2
Family	Species
Fabaceae	Acacia farnesiana* (L.) Willd.	Known for its antibacterial, antifungal, and anti-inflammatory properties. It is also used in traditional medicine for various ailments	GA, RO, SD	1		Phanerophyte	Bisexual	Megasclerochore		Casual
Amaranthaceae	Althaea ludwigiu L.	Exhibits anti-inflammatory and soothing properties, often used in herbal remedies for respiratory issues.	MG	2		Therophyte	Bisexual	Pterochore		Casual
Amaranthaceae	Arundo donax L.	Has been studied for its potential antibacterial and antifungal activities. It is also used in traditional medicine.	IR, MG	3		Geophyte – Helophyte	Bisexual	Sporochore		Casual
Amaranthaceae	Beta vulgaris subsp. maritima (L.) Arcang.	Contains antioxidants and has been shown to have anti-inflammatory effects.	WP, SD	5		Therophyte	Bisexual	Desmochore		Casual
Amaranthaceae	Brassica rapa L.var.rapa	Rich in glucosinolates, which have anticancer properties. It also has antioxidant activity.	FI	1		Therophyte	Bisexual	Cyclochore		Casual
Amaranthaceae	Cenchrus ciliaris L.	Known for its role in soil stabilization and as forage, but specific biological activities are less documented.	SD, RS	2		Hemicryptophyte	Bisexual	Desmochore		Casual
Amaranthaceae	Centaurea calcitrapa L.	Contains compounds with potential anti-inflammatory and antimicrobial properties.	IR, FI, FA, RO, WP	4		Chamephyte	Bisexual	Pogonochore		Casual
Amaranthaceae	Coriandrum sativum L.	Exhibits antimicrobial, antioxidant, and anti-inflammatory activities. Commonly used as a culinary herb.	FI, RO	1		Therophyte	Bisexual	Microsclerochore		Casual
Amaranthaceae	Dactylis glomerata L.	Primarily used as forage; some studies suggest it may have antioxidant properties.	FI, RS	1		Geophyte	Bisexual	Microsclerochore		Casual
Amaranthaceae	Eruca vesicaria* (L.) Cav.	Known for its antioxidant and anti-inflammatory properties, often used in salads.	FI	4		Therophyte	Bisexual	Ballochore		Casual
Amaranthaceae	Heliotrobium curassavicum Vahl	Contains alkaloids with potential medicinal properties, including anti-inflammatory effects.	GA	1		Chamaephyte	Bisexual	Sarcochore		Casual
Asteraceae	Hibiscus sabdariffa L.	Known for its antioxidant, antihypertensive, and anti-inflammatory properties. Used in teas and traditional medicine.	FI	1		Therophyte	Bisexual	Pterochore		Casual
Asteraceae	Hordeum vulgare L.	Barley has antioxidant properties and is used for its health benefits, including cholesterol-lowering effects.	FI	1		Therophyte	Bisexual	Barochore		Casual
Asteraceae	Ipomoea cairica (L.) Sweet	Some studies suggest it has potential antimicrobial properties.	RI, FI	1		Geophyte	Bisexual	Pyrenochore		Casual
Asteraceae	Lepidium draba L.	Contains compounds that may have herbicidal properties.	RO, WP	1		Hemicryptophyte	Bisexual	Microsclerochore		Casual
Asteraceae	Medicago sativa L.	Known for its high nutritional value and potential antioxidant and anti-inflammatory effects.	FI, RO, WP	1		Therophyte	Bisexual	Auxochore		Casual
Asteraceae	Rorippa palustris (L.) Besser	Contains compounds with potential antimicrobial and anti-inflammatory activities.	IR	1		Therophyte	Bisexual	Ballochore		Casual
Azollaceae	Zea mays L.	Corn is rich in antioxidants and has various health benefits, including cholesterol-lowering effects.	FI	1		Therophyte	Monoecious	Barochore		Casual
Boraginaceae	Amaranthus hybridus L.	Known for its nutritional value and potential antioxidant properties.	IR	2		Therophyte	Monoecious	Microsclerochore		Naturalized
Brassicaceae	Amaranthus lividus L.	Contains bioactive compounds with potential health benefits, including antioxidant properties.	WP	2		Therophyte	Monoecious	Microsclerochore		Naturalized
Brassicaceae	Amaranthus retroflexus L.	Known for its nutritional value, it contains antioxidants and has been studied for its potential anti-inflammatory properties.	WP	1		Therophyte	Monoecious	Microsclerochore		Naturalized
Brassicaceae	Amaranthus spinosus L.	Exhibits antioxidant and anti-inflammatory activities, and is also used in traditional medicine for various ailments.	FI	1		Therophyte	Monoecious	Microsclerochore		Naturalized
Brassicaceae	Atriplex canescens (Pursh) Nutt.	Known for its drought resistance and potential use in soil stabilization, it may also have some nutritional benefits.	RO	1		Phanerophyte	Dioecious	Pterochore		Naturalized
Convolvulaceae	Atriplex lindleyi subsp. Inflate (F. Muell.) P. G. Wilson	Contains compounds that may have potential health benefits, though specific biological activities are less documented.	WP, SD	1		Therophyte	Bisexual	Pterochore		Naturalized
Convolvulaceae	Atriplex nummularia Lindl.	Often used for soil stabilization and as forage, it may have some medicinal properties.	RO	1		Phanerophyte	Bisexual	Pterochore		Naturalized
Convolvulaceae	Bidens bipinnata L.	Known for its anti-inflammatory and antimicrobial properties, it is often used in traditional medicine.	MS	1		Therophyte	Bisexual	Pogonochore		Naturalized
Euphorbiaceae	Bidens pilosa L.	Exhibits various biological activities, including antimicrobial, anti-inflammatory, and antioxidant effects.	FI, WP	1		Therophyte	Bisexual	Desmochore		Naturalized
Euphorbiaceae	Bromus catharticus Vahl	Primarily used as forage, with some studies suggesting potential health benefits.	IR, FI	3		Therophyte	Bisexual	Ballochore		Naturalized
Euphorbiaceae	Cenchrus echinatus L.	Known for its role in soil stabilization; specific biological activities are less documented.	FI	1		Therophyte	Bisexual	Desmochore		Naturalized
Fabaceae	Conyza bonariensis (S.Moore) Cufod.	Contains compounds with potential anti-inflammatory and antimicrobial properties.	FI, RO, WP	1						Naturalized
Fabaceae	Cuscuta chinensis Lam.	Known for its traditional medicinal uses, it may have antioxidant and anti-inflammatory effects.	FI	1		Phanerophyte	Bisexual	Sporochore		Naturalized
Fabaceae	Datura innoxia Mill.	Contains alkaloids with potential medicinal properties, including analgesic and sedative effects.	MG, WP	1		Therophyte	Bisexual	Ballochore		Naturalized
Lamiaceae	Datura stramonium L.	Known for its psychoactive properties, it also has potential medicinal uses, though it can be toxic.	FI, GA, RO, WP	1		Therophyte	Bisexual	Ballochore		Naturalized
Malvaceae	Dinebra retroflexa (Vahl) Panz.	Some studies suggest it may have potential antimicrobial properties.	MG, FI, WP	1		Therophyte	Bisexual	Desmochore		Naturalized
Malvaceae	Dysphania ambrosioides (L.)Mosyakin & Clemants	Known for its anthelmintic and antimicrobial properties, often used in traditional medicine.	IR	3		Chamaephyte	Bisexual	Auxochore		Naturalized
Moraceae	Eclipta prostrata (L.) L.	Exhibits hepatoprotective, anti-inflammatory, and antioxidant activities.	IR, RO	2		Chamaephyte	Bisexual	Pogonochore		Naturalized
Oxalidaceae	Euphorbia heterophylla L.	Contains compounds with potential anti-inflammatory and antimicrobial properties.	FI	1		Therophyte	Monoecious	Sarcochore		Naturalized
Poaceae	Euphorbia prostrata Aiton	Known for its traditional medicinal uses, it may have some antioxidant properties.	FI, RO, WP	1		Therophyte	Monoecious	Sarcochore		Naturalized
Poaceae	Ficus carica L.	Commonly known as fig, it has antioxidant properties and is used for its health benefits.	FI	1		Phanerophyte	Monecious	Sarcochore		Naturalized
Poaceae	Lantana camara L.	Contains compounds with potential antimicrobial and anti-inflammatory properties, though	FI, WP, FL	1		Phanerophyte	Bisexual	Sarcochore		Naturalized
Poaceae	Lycium europaeum L.	Antioxidant, anti-inflammatory, anti-cancer.	GA	1		Phanerophyte	Bisexual	Sarochore		Naturalized
Poaceae	Mentha spicata L. subsp. spicata		FI	1		Geophyte	Bisexual	Microsclerochore		Naturalized
Poaceae	Nicotiana glauca R. C. Graham		MG, SD	2		Phanerophyte	Bisexual	Ballochore		Naturalized
Poaceae	Nicotiana rustica L.		MG	1		Therophyte	Bisexual	Ballochore		Naturalized
Poaceae	Oxalis corniculata L.	Antioxidant, anti-inflammatory.	MG, GA	2		Geophyte – Helophyte	Bisexual	Ballochore		Naturalized
Poaceae	Ricinus communis L.		SD, WB	5		Phanerophyte	Monoecious	Desmochore		Naturalized
Poaceae	Rubus sanctus Schreb.	Antioxidant, anti-inflammatory.	GA	1		Phanerophyte	Bisexual	Barochores		Naturalized
Poaceae	Sesbania sesban (L.) Merr.	Antioxidant, anti-inflammatory.		3		Phanerophyte	Bisexual	Ballochore		Naturalized
Pontederiaceae	Setaria pumila (Poir.) Roem. & Schult.		MG, WP	1		Theropyhte	Bisexual	Microsclerochore		Naturalized
Rhamnaceae	Setaria verticillata (L.) Beauv.		IS, FI, GA	2		Theropyhte	Bisexual	Desmochore		Naturalized
Rosaceae	Setaria viridis (L.) Beauv.	Antioxidant, anti-inflammatory.	FI	2		Theropyhte	Bisexual	Desmochore		Naturalized
Solanaceae	Solanum elaeagnifolium Cav.	Antibacterial, antifungal, anti-inflammatory.		1		Chamaephyte	Bisexual	Sarcochore		Naturalized
Solanaceae	Sorghum virgatum (Hack.) Stapf.	Antioxidant, anti-inflammatory.		1		Theropyhte	Bisexual	Barochore		Naturalized
Solanaceae	Symphyotrichum squamatum (Spreng.) Nesom	Antioxidant, anti-inflammatory.	IR, FI, RO, WP	2		Chamaephyte		Pogonochore		Naturalized
Solanaceae	Trifolium alexandrinum L.	Antioxidant, anti-inflammatory.	FI	1		Theropyhte	Bisexual	Pterochore		Naturalized
Solanaceae	Ziziphus spina-christi (L.) Desf.		FI, SD, WB	4		Phanerophyte	Bisexual	Sarcochore		Naturalized
Solanaceae	Azolla filiculoides L.	Antioxidant, anti-inflammatory, nitrogen-fixing.	IR, RI	2		Hydrophyte	Spore	Auxochore		Invasive
Solanaceae	Bassia indica (Wight) A. J. Scott	Antioxidant, anti-inflammatory.	RO, SD	6		Therophytes	Bisexual	Cyclochore		Invasive
Umbelliferae	Eichhornia crassipes (C. Mart.) Solms	Antioxidant, anti-inflammatory	AQ	3		Hydrophyte	Bisexual	Water, wind, Auxochore		Invasive
Verbenaceae	Ipomoea carnea Jacq.	Antioxidant, anti-inflammatory.	IR, MG	2		Chamaephyte	Bisexual	Auxochore		Invasive

## Sheet: Life form & Habitats
Life Form			Habitat			Auxochore
						Auxochore
Phanerophyte	12		GA, RO, SD			Auxochore
Geophyte – Helophyte	2		MG			Auxochore
Chamaephyte	7		IR, MG			Ballochore		Auxochore	5
Geophyte	3		WP, SD			Ballochore		Ballochore	9
Hemicryptophyte	2		FI			Ballochore		Barochore	4
Hydrophyte	2		SD, RS			Ballochore		Cyclochore	2
Therophyte	32		IR, FI, FA, RO, WP			Ballochore		Desmochore	8
			FI, RO			Ballochore		Megasclerochore	1
			FI, RS			Ballochore		Microsclerochore	9
			FI			Ballochore		Pogonochore	4
			GA			Ballochore		Pterochore	6
			FI			Barochore		Pyrenochore	1
			FI			Barochore		Sarcochore	8
			RI, FI			Barochore		Sporochore	2
			RO, WP			Barochores
			FI, RO, WP			Cyclochore
			IR			Cyclochore
			FI			Desmochore
			IR			Desmochore
			WP			Desmochore
			WP			Desmochore
			FI			Desmochore
			RO			Desmochore
			WP, SD			Desmochore
			RO			Desmochore
			MS			Disbersal Type
			FI, WP			Megasclerochore
			IR, FI			Microsclerochore
	31		FI			Microsclerochore
			FI, RO, WP			Microsclerochore
			FI			Microsclerochore
			MG, WP			Microsclerochore
			FI, GA, RO, WP			Microsclerochore
			MG, FI, WP			Microsclerochore
			IR			Microsclerochore
			IR, RO			Microsclerochore
			FI			Pogonochore
			FI, RO, WP			Pogonochore
			FI			Pogonochore
			FI, WP, FL			Pogonochore
			GA			Pterochore
			FI			Pterochore
			MG, SD			Pterochore
			MG			Pterochore
			MG, GA			Pterochore
			SD, WB			Pterochore
			GA			Pyrenochore
						Sarcochore
			MG, WP			Sarcochore
			IS, FI, GA			Sarcochore
			FI			Sarcochore
						Sarcochore
						Sarcochore
			IR, FI, RO, WP			Sarcochore
			FI			Sarochore
			FI, SD, WB			Sporochore
			IR, RI			Sporochore
			RO, SD			Water, wind, Auxochore
			AQ
			IR, MG

## Sheet: Status
Native	1979
Non-native	116
Invasive	4
Naturalized	38
Casual	18

## Sheet: Sheet4
Species		Number				Number of protected area	Number of alien species
Beta vulgaris subsp. maritima (L.) Arcang.		5				1	37
Centaurea calcitrapa L		4				2	12
Eruca vesicaria* (L.) Cav.		4				3	5
Ricinus communis L.		5				4	2
Ziziphus spina-christi (L.) Desf.		4				5	2
Bassia indica (Wight) A. J. Scott		6				6	1
